# Supplementary material for: Study of Oxidation and Polarization-Dependent Optical Properties of Environmentally Stable Layered GaTe Using a Novel Passivation Approach
Source: MDPI journal article supplement (doi:10.3390/nano9111510), 2019-10-23
Supplement: s2 [file s2]

## Supplementary material

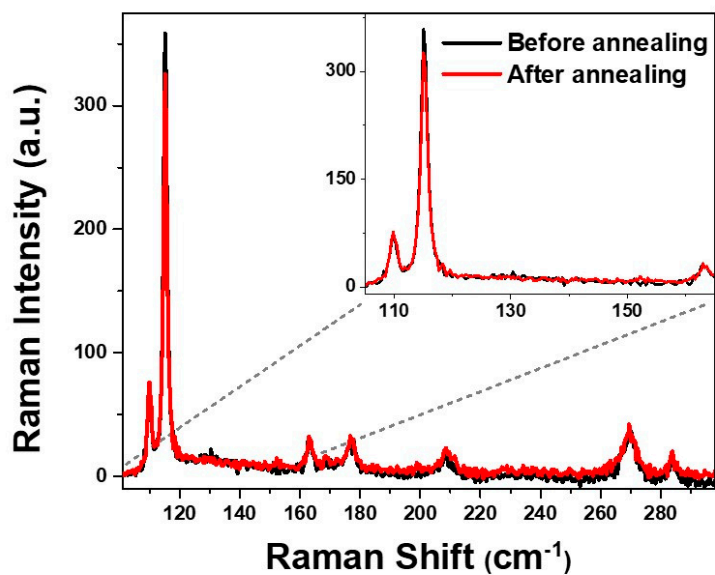

Figure S1: Effect of annealing on as-exfoliated GaTe flakes in a pure oxygen ambient at 200 °C for 30 minutes

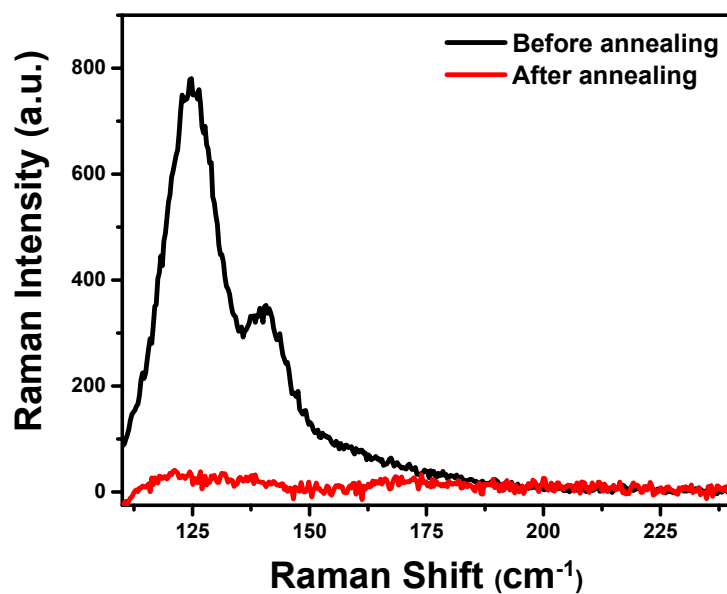

Figure S2: Effect of annealing on oxidized flakes in an argon ambient at 300 °C for 30 minutes

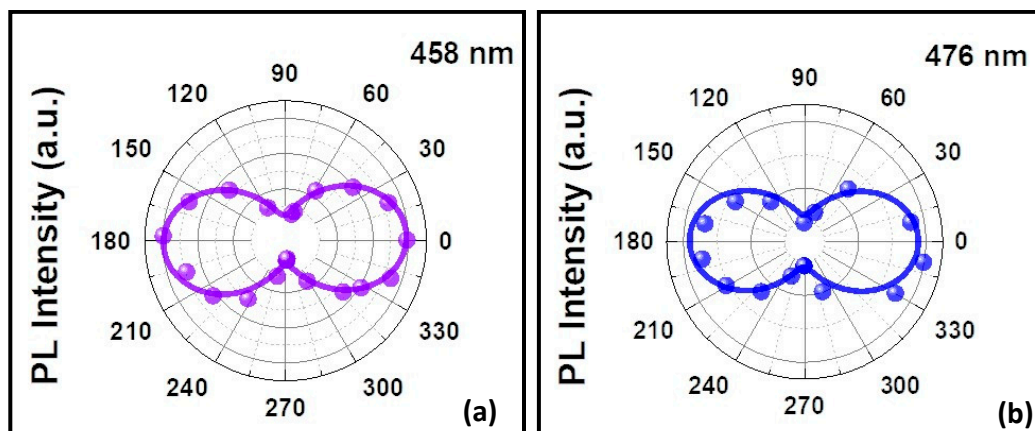

**Figure S3:** Polarization dependence of PL peak intensity (1.66 eV) of a 100 nm GaTe flake measured using excitation wavelength of (a) 458 nm; (b) 476 nm
